# Supplementary material for: Neurophysiological Indices of Atypical Auditory Processing and Multisensory Integration are Associated with Symptom Severity in Autism
Source: Springer Nature journal article supplement (doi:10.1007/s10803-014-2212-9), 2014-09-22
Supplement: MOESM1 [file 558896]

Supplementary Tables

**Table 1.** Range, mean, and standard deviations of age, verbal and performance IQ for the analysis of *autism symptom severity* (N=42).

|  | **Age** | **Verbal IQ** | **Performance IQ** |
| --- | --- | --- | --- |
| **Range** | 6-16 years | 55-150 | 82-150 |
| **Mean (s.d.)** | 10.6 (2.5) | 101 (23) | 109 (16) |

'Verbal IQ' and 'Performance IQ' as assessed by the Wechsler Abbreviated Scale of Intelligence (WASI).

**Table 2.** Range, mean, and standard deviations of age, verbal and performance IQ for the analysis of *visual and auditory sensitivities* (N=46).

|  | **Age** | **Verbal IQ** | **Performance IQ** |
| --- | --- | --- | --- |
| **Range** | 6-17 years | 55-150 | 82-150 |
| **Mean (s.d.)** | 11.2 (2.9) | 101 (21) | 109 (16) |
